# Supplementary material for: Modeling elongational viscosity and brittle fracture of 10 polystyrene Pom-Poms by the hierarchical molecular stress function model
Source: Springer Nature journal article supplement (doi:10.1007/s00397-023-01393-0), 2023-04-05
Supplement: MOESM1 [file 25213518]

## Support Information (SI)

### Modeling elongational viscosity and brittle fracture of 10 polystyrene Pom-Poms by the Hierarchical Molecular Stress Function model

Valerian Hirschberg<sup>1</sup>, Max G. Schußmann<sup>1</sup>, Marie-Christin Röpert<sup>1</sup>, Manfred Wilhelm<sup>1</sup>,  
Manfred H. Wagner<sup>2</sup>

<sup>1</sup>*Institute of Chemical Technology and Polymer Chemistry (ITCP), Karlsruhe Institute of Technology (KIT), Engesserstraße 18, 76131 Karlsruhe, Germany*

<sup>2</sup>*Polymer Engineering/Polymer Physics, Berlin Institute of Technology (TU Berlin), Ernst-Reuter-Platz 1, 10587 Berlin, Germany*

## 1. Linear-viscoelastic Characterization

Storage modulus  $G'$  (full symbols), loss modulus  $G''$  (open symbols), loss tangent  $\delta$  at the reference temperature 160°C:

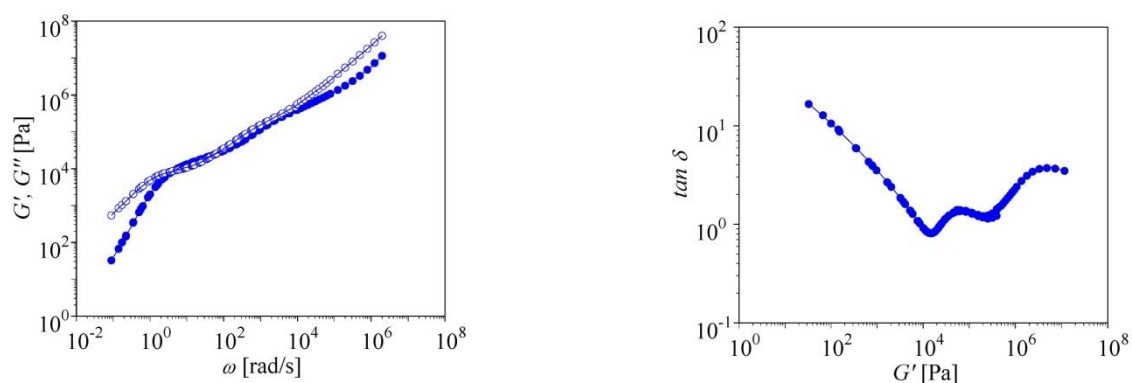

Figure SI.1: 100k-2x11-9k

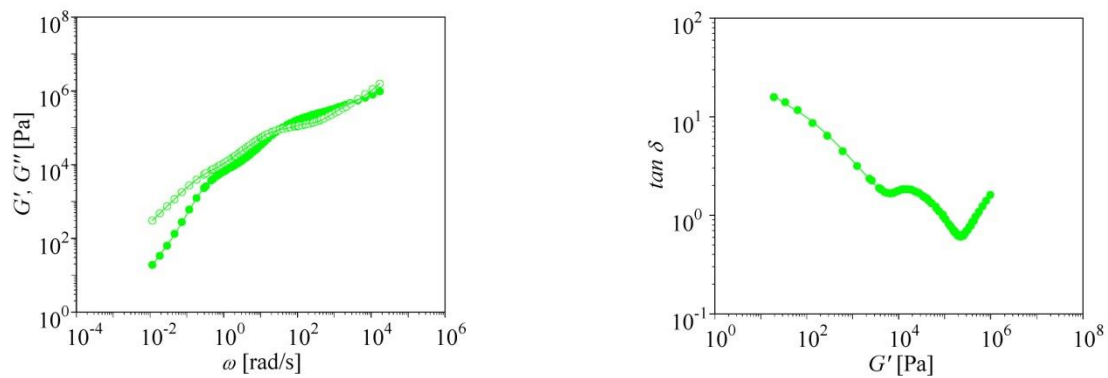

Figure SI.2: 100k-2x12-24k

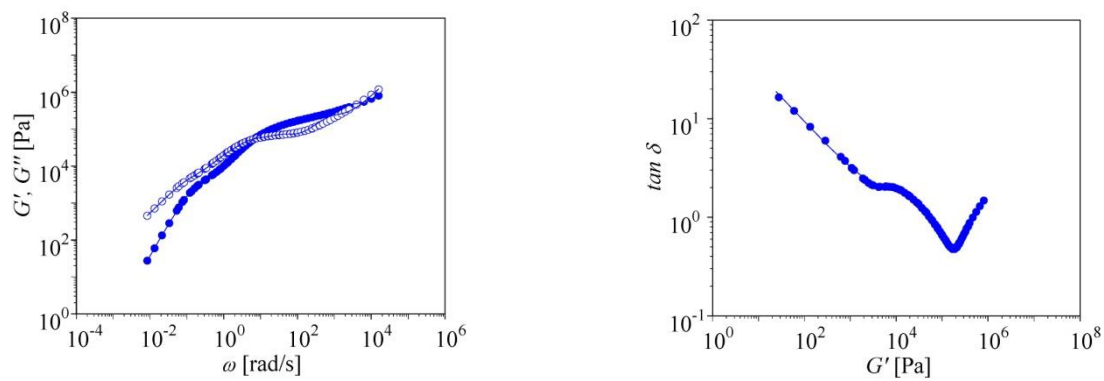

Figure SI.3: 100k-2x12-40k

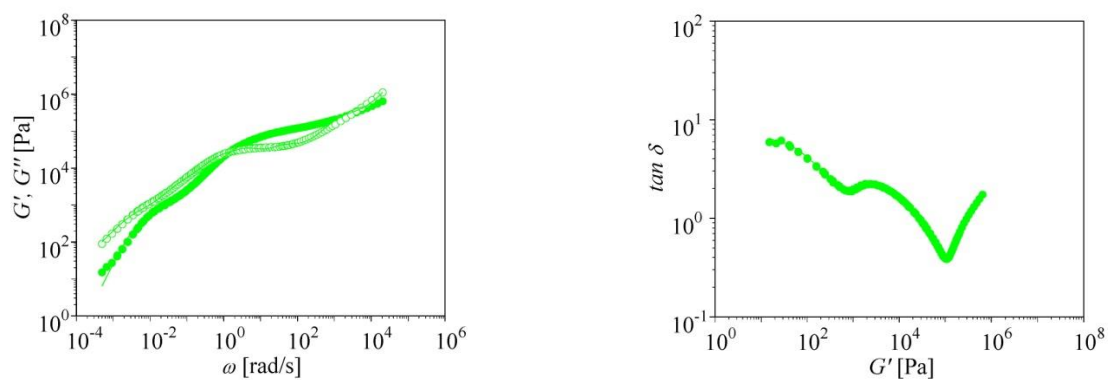

Figure SI.4: 100k-2x14-50k

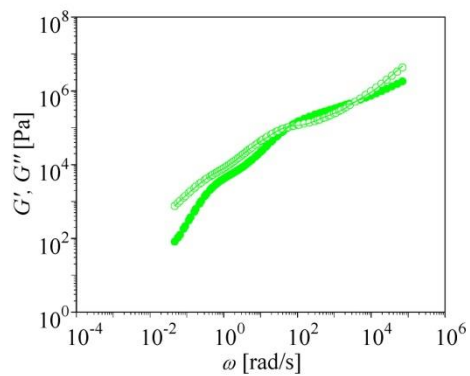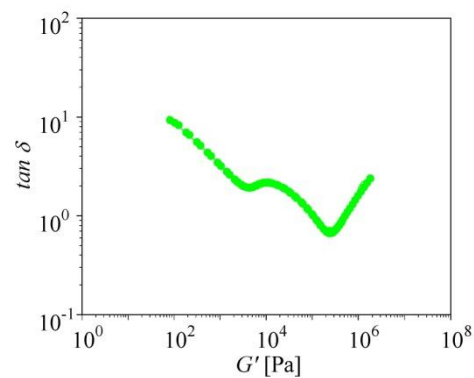

Figure SI.5: 100k-2x22-25k

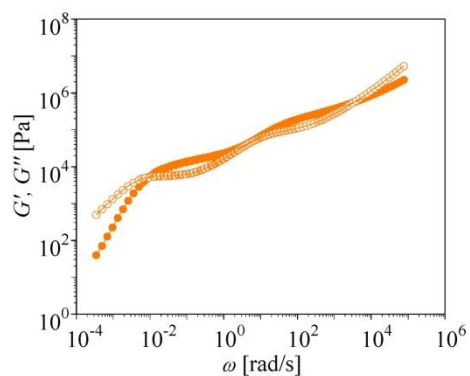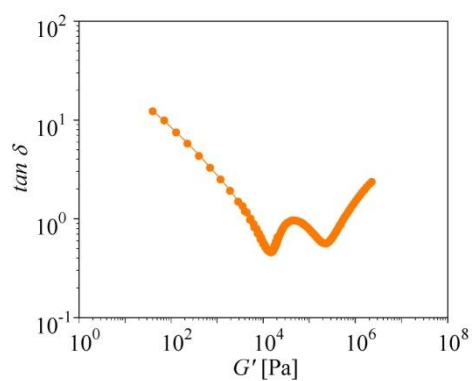

Figure SI.6: 220k-2x9-25k

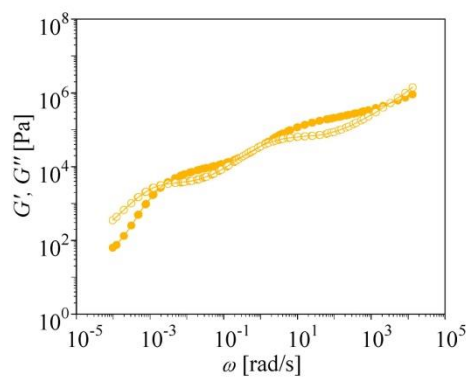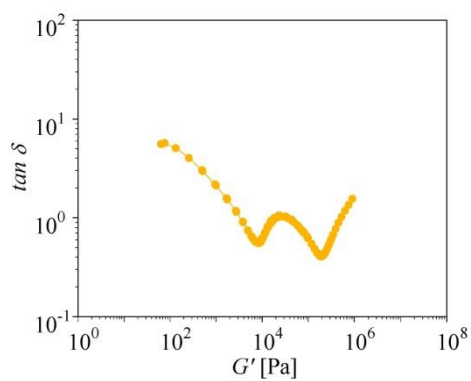

Figure SI.7: 220k-2x10-40k

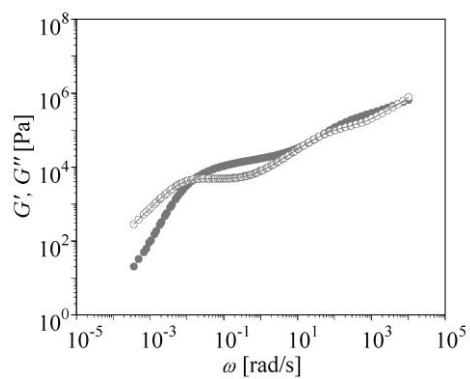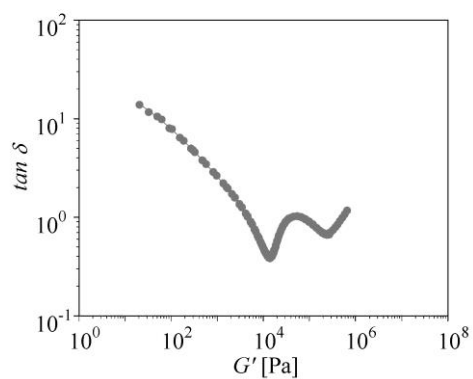

Figure SI.8: 280k-2x22-22k

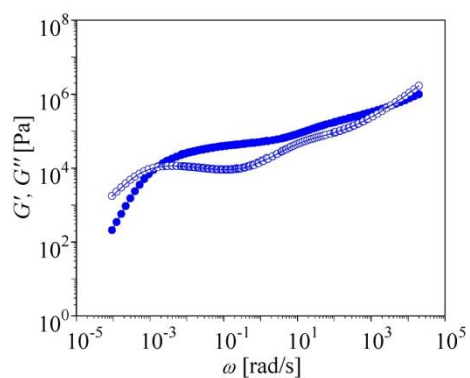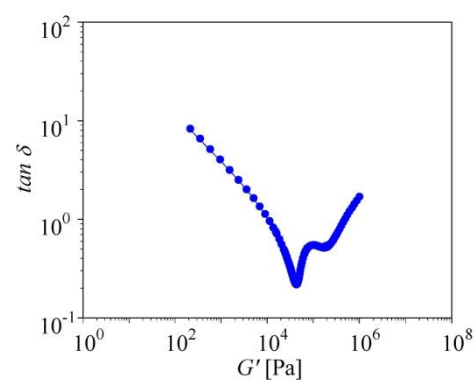

Figure SI.9: 400k-2x9-23k

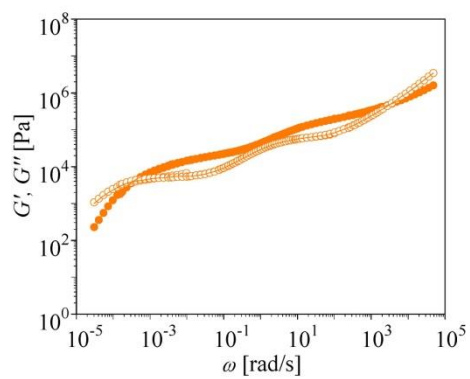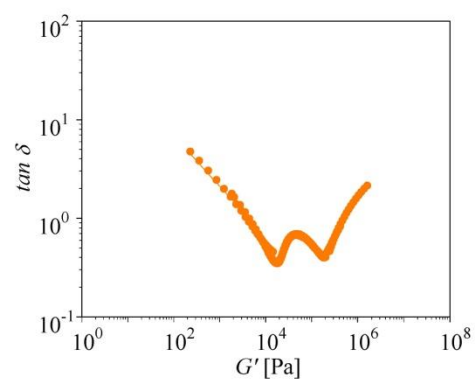

Figure SI.10:400k-2x13-40k

## 2. Shift factors

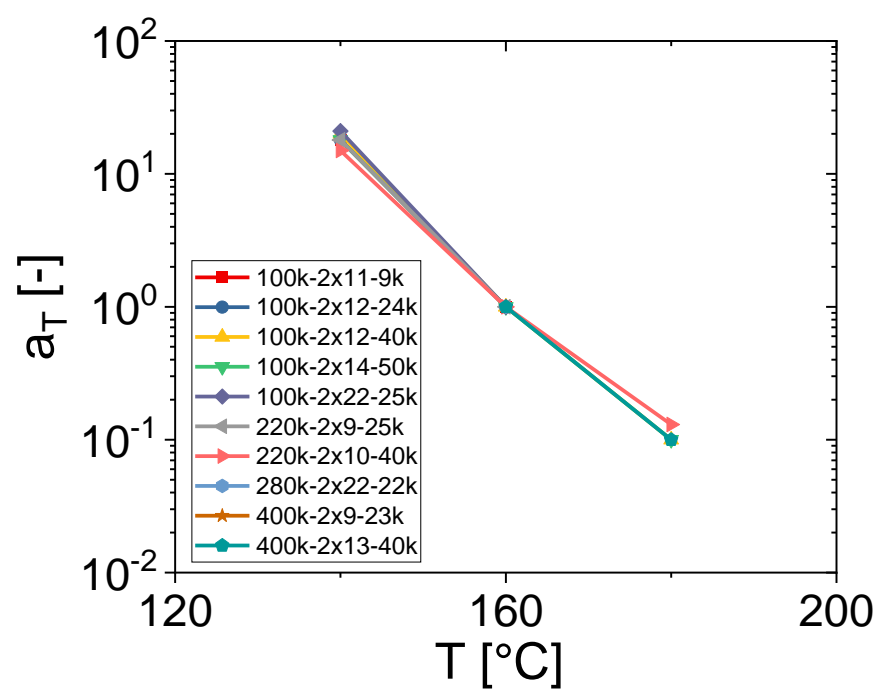

Figure SI.11: Shift factors of the pom-poms

### 3. Relaxation spectra at the reference temperature 160°C

**Table SI.1a**

| <b>100k-2x11-9k</b> |              | <b>100k-2x12-24k</b> |              | <b>100k-2x12-40k</b> |              |
|---------------------|--------------|----------------------|--------------|----------------------|--------------|
| $g_i$ [Pa]          | $\tau_i$ [s] | $g_i$ [Pa]           | $\tau_i$ [s] | $g_i$ [Pa]           | $\tau_i$ [s] |
| 2.034e+008          | 1.050e-007   | 9.801e+006           | 8.820e-006   |                      |              |
| 2.842e+006          | 2.890e-006   | 3.917e+005           | 1.685e-004   | 4.772e+006           | 1.697e-005   |
| 6.238e+005          | 3.220e-005   | 1.588e+005           | 9.727e-004   | 3.121e+005           | 1.117e-003   |
| 2.305e+005          | 3.084e-004   | 9.294e+004           | 5.670e-003   | 8.978e+004           | 2.709e-002   |
| 8.451e+004          | 1.726e-003   | 9.519e+004           | 2.379e-002   | 6.699e+004           | 1.618e-001   |
| 1.720e+004          | 1.463e-002   | 4.405e+004           | 7.062e-002   | 1.239e+004           | 7.703e-001   |
| 9.206e+003          | 1.247e-001   | 7.336e+003           | 2.854e-001   | 3.823e+003           | 7.584e+000   |
| 7.453e+003          | 5.805e-001   | 4.445e+003           | 1.524e+000   | 6.143e+001           | 5.679e+001   |
| 2.567e+001          | 1.011e+001   | 2.727e+003           | 3.715e+000   |                      |              |
|                     |              | 3.502e+001           | 3.148e+001   |                      |              |

**Table SI.1b**

| <b>100k-2x14-50k</b> |              | <b>100k-2x22-25k</b> |              |
|----------------------|--------------|----------------------|--------------|
| $g_i$ [Pa]           | $\tau_i$ [s] | $g_i$ [Pa]           | $\tau_i$ [s] |
| 5,674e+006           | 9,930e-006   | 1.997e+005           | 1.613e-003   |
| 2,383e+005           | 2,570e-004   | 1.882e+007           | 3.826e-006   |
| 7,453e+004           | 2,351e-003   | 4.655e+005           | 1.660e-004   |
| 3,967e+004           | 2,008e-002   | 1.558e+005           | 1.726e-002   |
| 4,275e+004           | 1,349e-001   | 2.382e+004           | 1.153e-001   |
| 3,235e+004           | 7,386e-001   | 4.865e+003           | 1.823e+000   |
| 7,125e+003           | 3,357e+000   | 1.960e+002           | 1.063e+001   |
| 1,014e+003           | 2,464e+001   |                      |              |
| 7,004e+002           | 1,388e+002   |                      |              |
| 2,116e+001           | 2,224e+003   |                      |              |

**Table SI.1c**

| <b>220k-2x9-25k</b> |              | <b>220k-2x10-40k</b> |              | <b>280k-2x22-22k</b> |              |
|---------------------|--------------|----------------------|--------------|----------------------|--------------|
| $g_i$ [Pa]          | $\tau_i$ [s] | $g_i$ [Pa]           | $\tau_i$ [s] | $g_i$ [Pa]           | $\tau_i$ [s] |
| 3.877e+007          | 1.766e-006   | 9.392e+006           | 1.082e-005   | 3.589e+006           | 2.016e-005   |
| 9.183e+005          | 4.118e-005   | 3.651e+005           | 2.298e-004   | 2.501e+005           | 3.292e-004   |
| 3.337e+005          | 2.382e-004   | 1.372e+005           | 1.515e-003   | 1.173e+005           | 2.100e-003   |
| 1.516e+005          | 1.282e-003   | 7.125e+004           | 9.455e-003   | 9.994e+004           | 9.265e-003   |
| 9.621e+004          | 7.073e-003   | 6.365e+004           | 5.287e-002   | 3.809e+004           | 3.610e-002   |
| 8.644e+004          | 3.302e-002   | 5.934e+004           | 2.194e-001   | 1.060e+004           | 1.827e-001   |
| 4.610e+004          | 1.197e-001   | 3.443e+004           | 8.280e-001   | 4.493e+003           | 9.964e-001   |
| 1.192e+004          | 5.936e-001   | 8.253e+003           | 4.008e+000   | 3.927e+003           | 4.887e+000   |
| 5.222e+003          | 3.357e+000   | 3.223e+003           | 2.270e+001   | 4.229e+003           | 2.107e+001   |
| 4.990e+003          | 1.697e+001   | 3.076e+003           | 1.013e+002   | 5.204e+003           | 7.794e+001   |
| 5.993e+003          | 7.966e+001   | 3.615e+003           | 4.258e+002   | 1.321e+003           | 1.936e+002   |
| 3.436e+003          | 2.367e+002   | 1.325e+003           | 1.128e+003   | 1.722e+001           | 3.172e+003   |
| 2.299e+001          | 3.178e+003   |                      |              |                      |              |

**Table SI.1d**

| <b>400k-2x9-23k</b> |              | <b>400k-2x13-40k</b> |              |
|---------------------|--------------|----------------------|--------------|
| $g_i$ [Pa]          | $\tau_i$ [s] | $g_i$ [Pa]           | $\tau_i$ [s] |
| 1.692e+007          | 4.438e-006   | 3.597e+007           | 1.796e-006   |
| 4.587e+005          | 8.190e-005   | 7.911e+005           | 3.709e-005   |
| 1.996e+005          | 3.543e-004   | 3.201e+005           | 1.876e-004   |
| 1.093e+005          | 1.513e-003   | 1.419e+005           | 9.531e-004   |
| 7.765e+004          | 6.991e-003   | 7.604e+004           | 5.178e-003   |
| 6.289e+004          | 3.276e-002   | 5.369e+004           | 2.806e-002   |
| 3.277e+004          | 1.343e-001   | 4.797e+004           | 1.004e-001   |
| 1.120e+004          | 7.990e-001   | 3.803e+004           | 3.576e-001   |
| 7.346e+003          | 4.737e+000   | 1.797e+004           | 1.277e+000   |
| 8.167e+003          | 2.195e+001   | 6.632e+003           | 5.331e+000   |
| 1.022e+004          | 9.186e+001   | 4.792e+003           | 2.556e+001   |
| 1.183e+004          | 3.692e+002   | 5.877e+003           | 1.403e+002   |
| 8.995e+003          | 1.318e+003   | 4.794e+003           | 6.769e+002   |
| 3.088e+002          | 5.558e+003   | 4.493e+003           | 3.213e+003   |
|                     |              | 1.287e+003           | 1.300e+004   |
